# Supplementary material for: Effect of BIO-PLYTM, a Platelet-Rich Plasma Derived Biologic on PRRSV-2-Infected Macrophages
Source: MDPI journal article supplement (doi:10.3390/v14122666), 2022-11-28
Supplement: s1 [file s1]

## Supplementary Figures

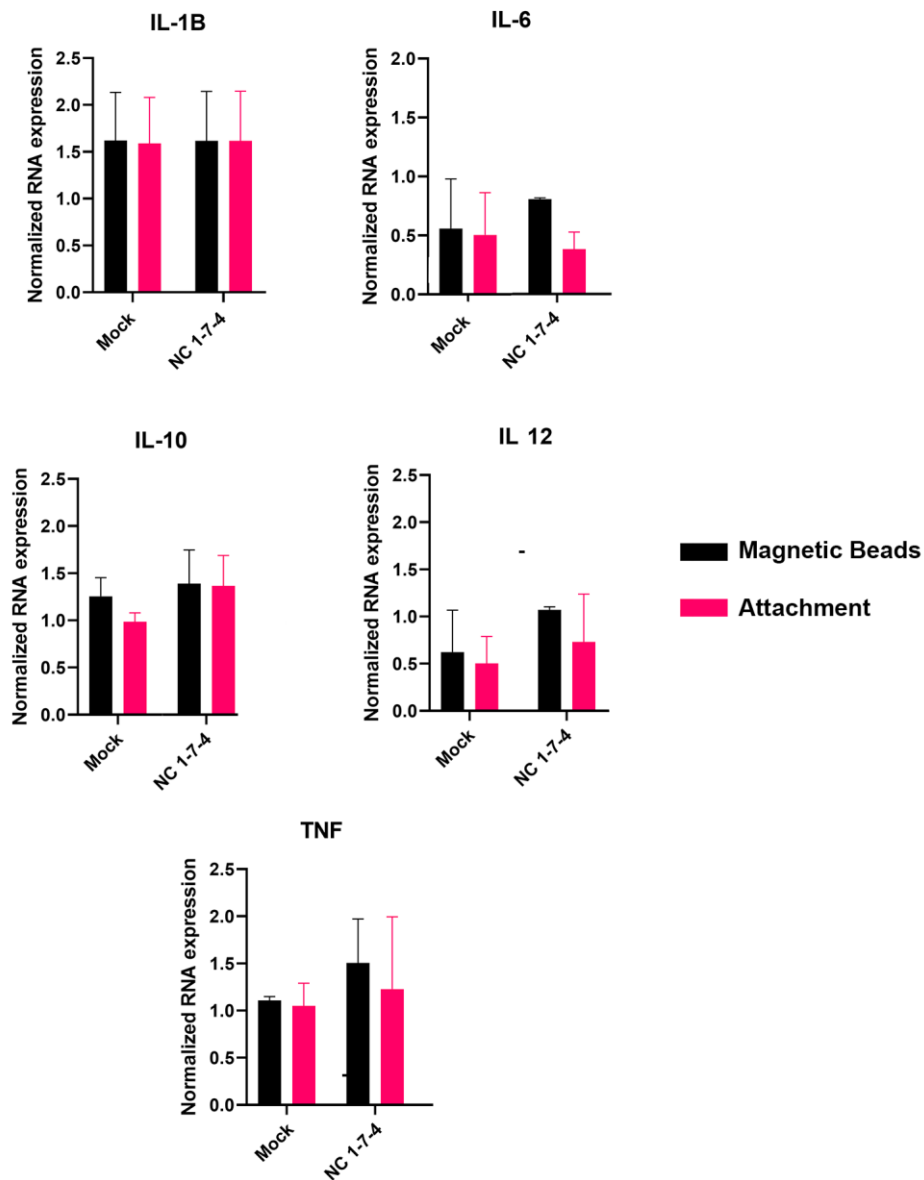

**Figure S1:** Comparison of the cytokine responses of macrophages isolated using magnetic beads or attachment to plastic cultures plates

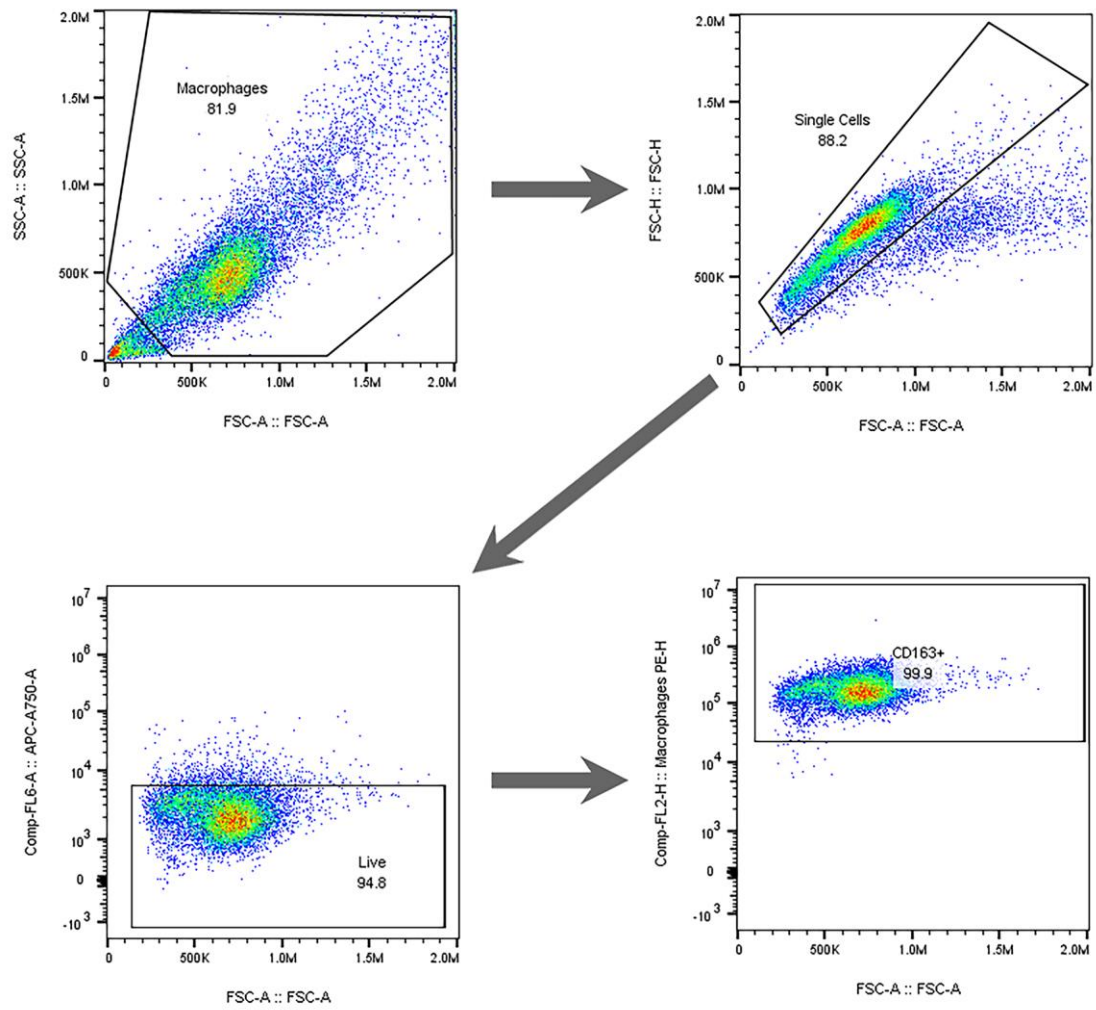

**Figure S2:** Gating strategy for the macrophage viability assay

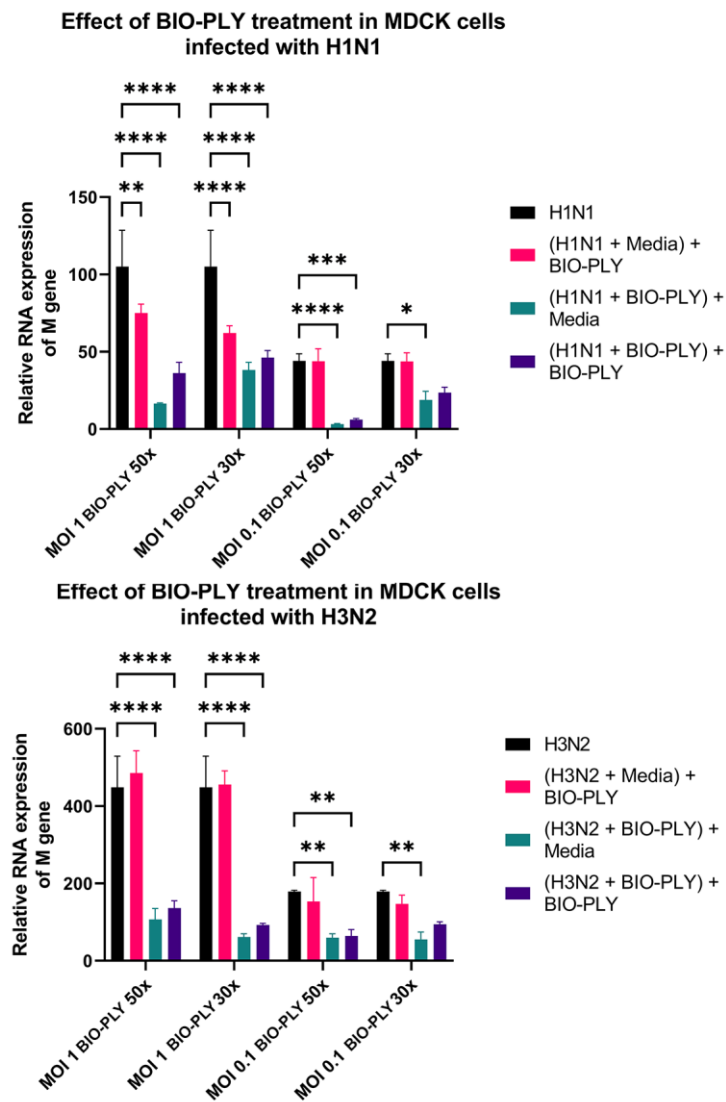

**Figure S3:** Effect of BIO-PLY™ on the reduction of viral copies in MDCK cells infected with human influenza

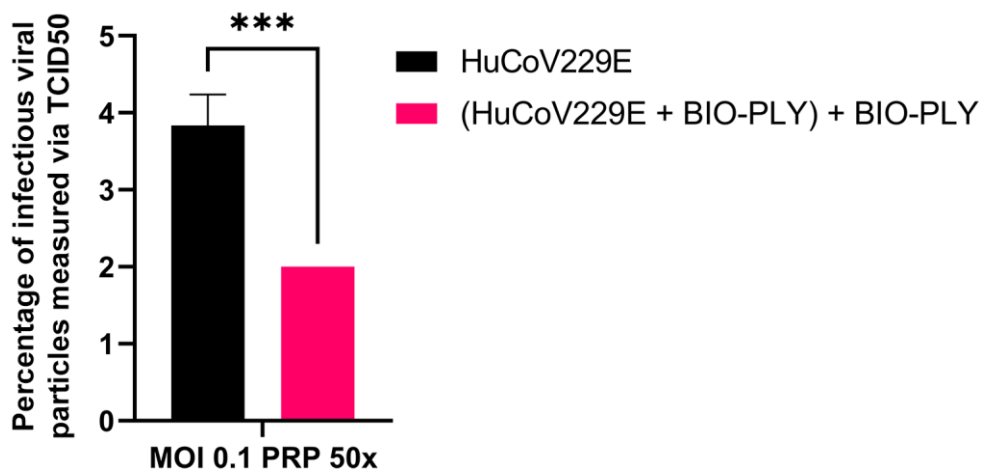

**Figure S4:** Effect of BIO-PLY™ on the reduction of human coronavirus HuCoV229E titer in Huh-7 cells

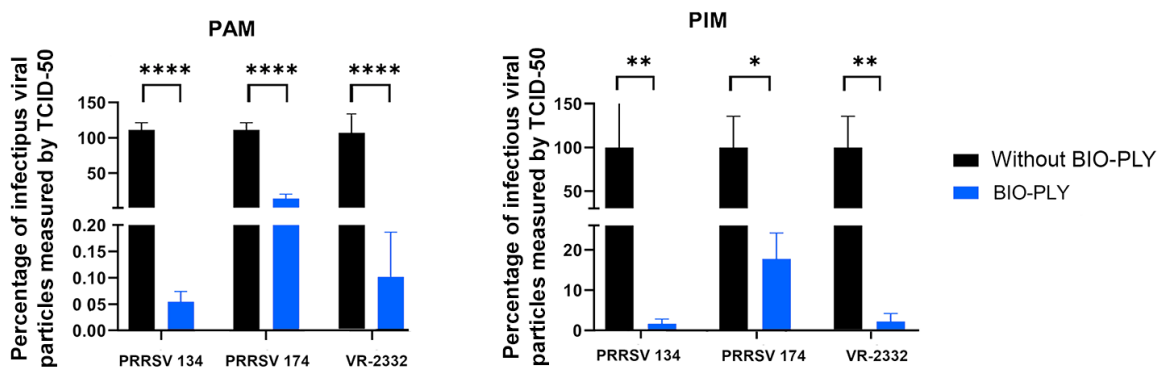

**Figure S5:** Effect of equine BIO-PLY™ treatment on the production of infectious viral particles in porcine alveolar macrophages (PAM) and pulmonary intravascular macrophages (PIM) measured as TCID50.
